# Supplementary material for: Ubiquitin fusion proteins in algae: implications for cell biology and the spread of photosynthesis
Source: PubMed Central journal article supplement (PMC6332867; doi:10.1186/s12864-018-5412-4), 2019-01-14

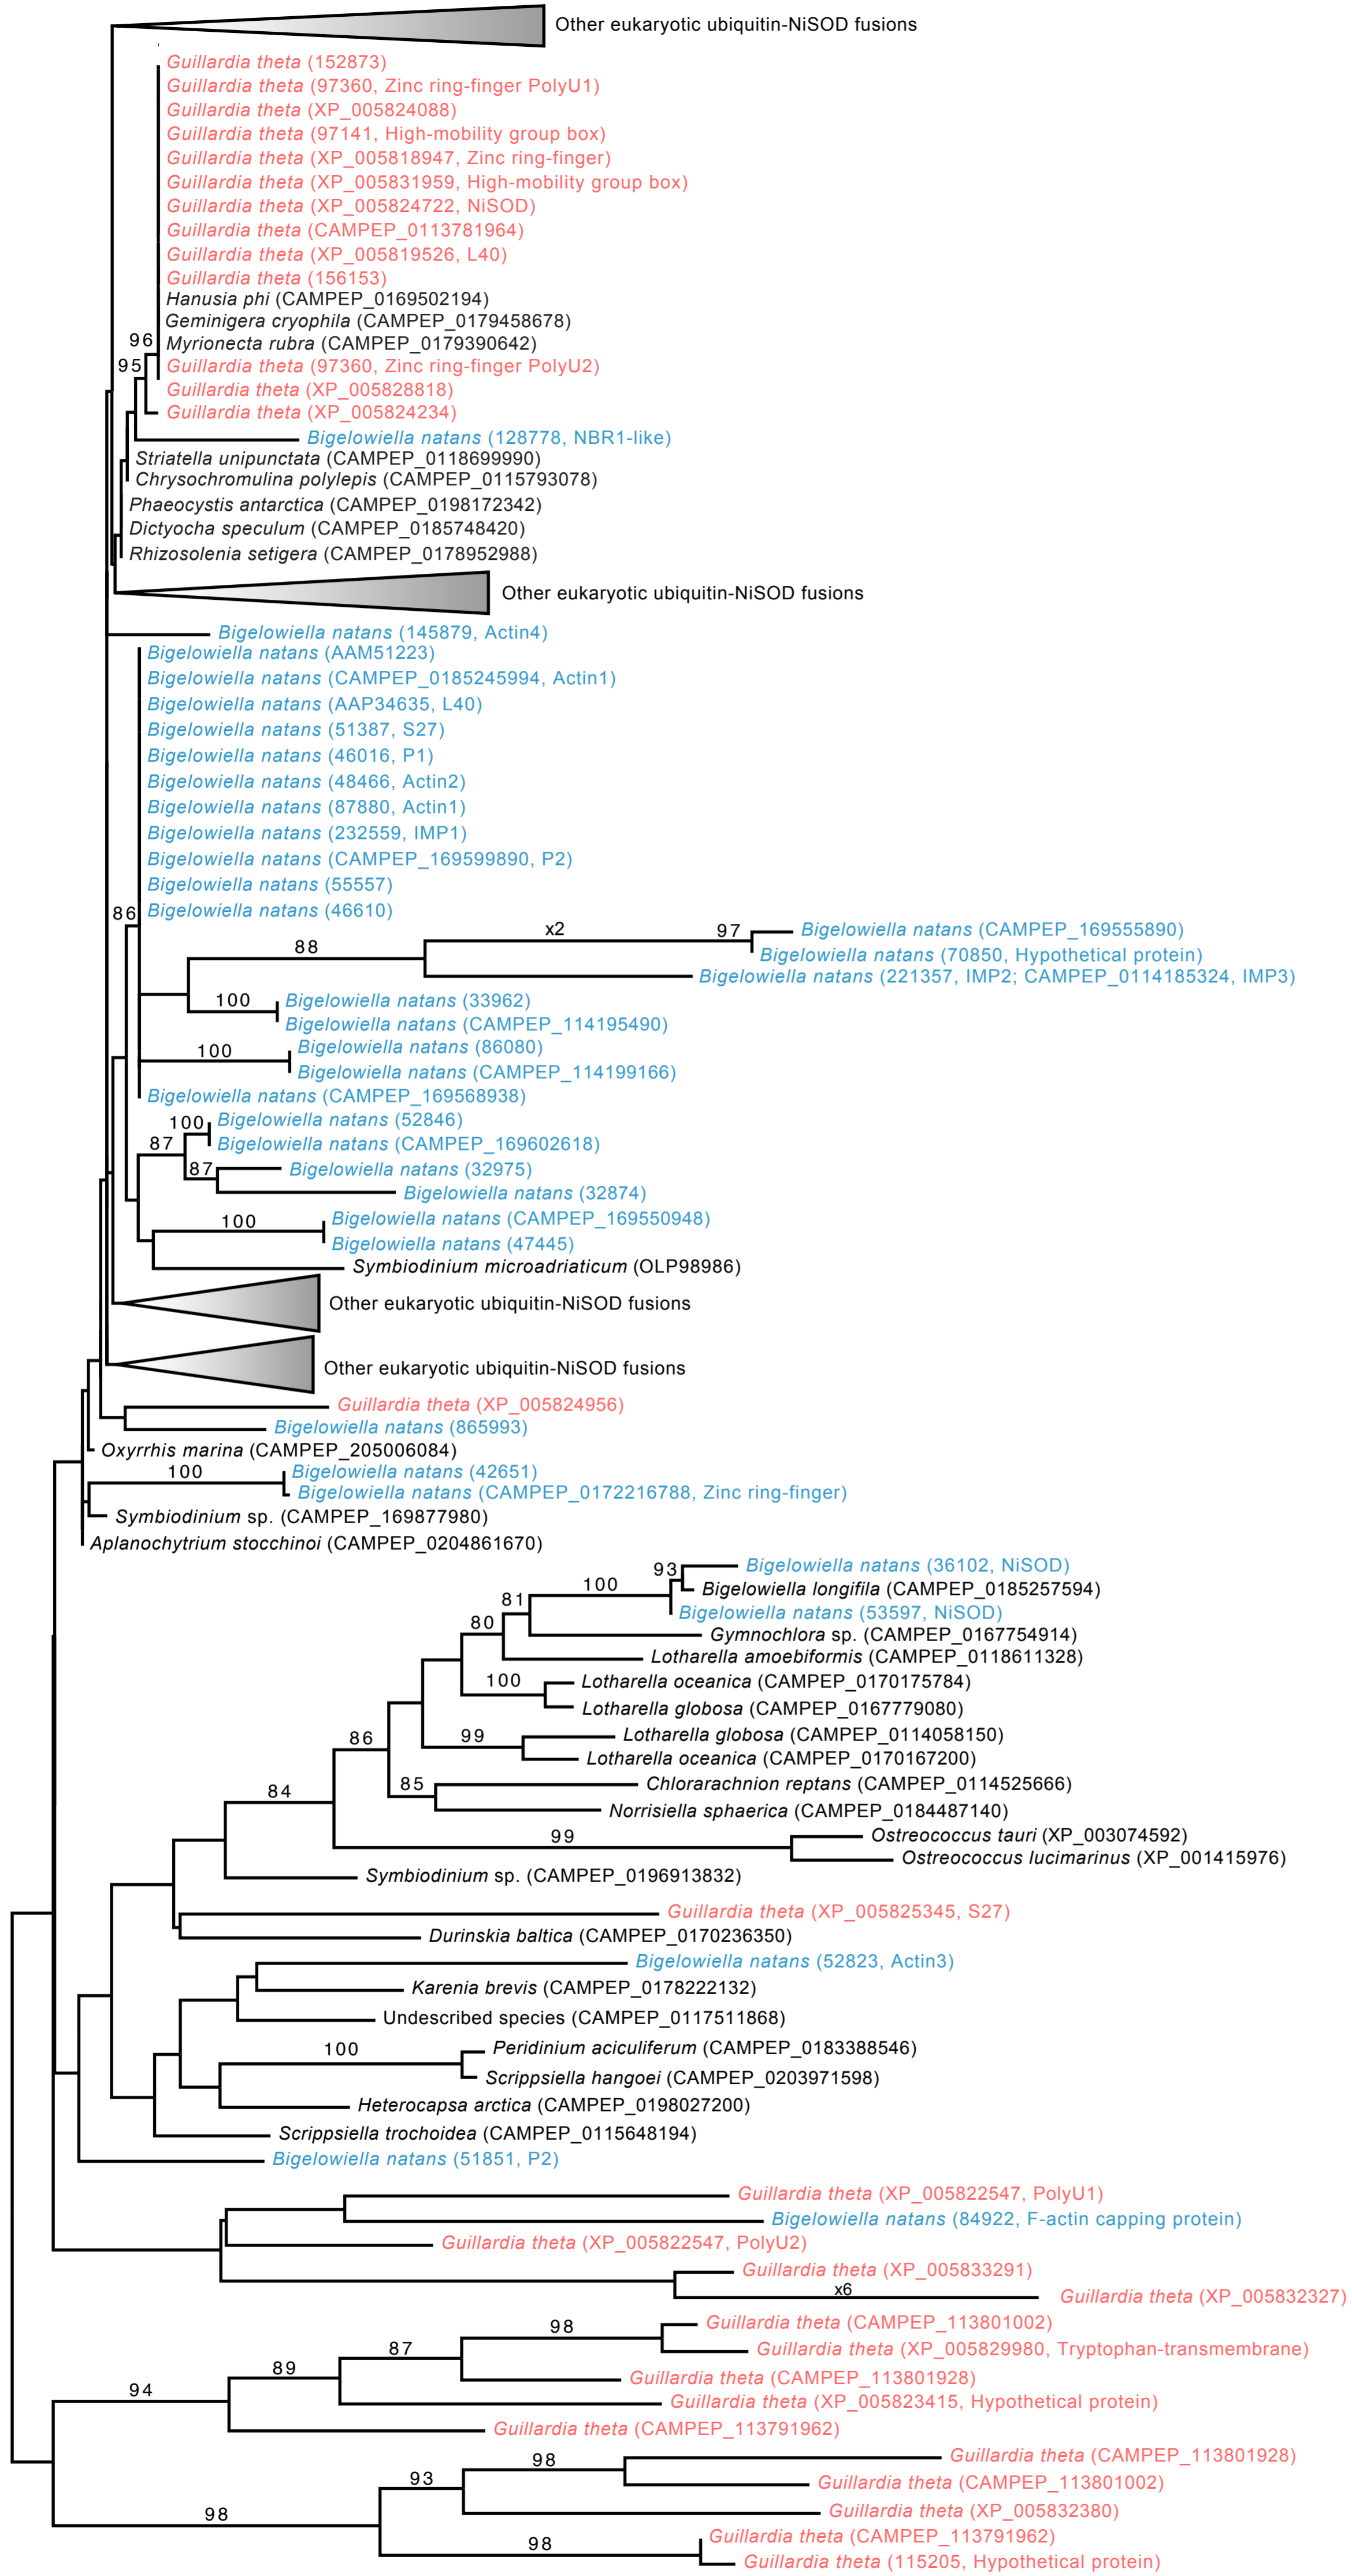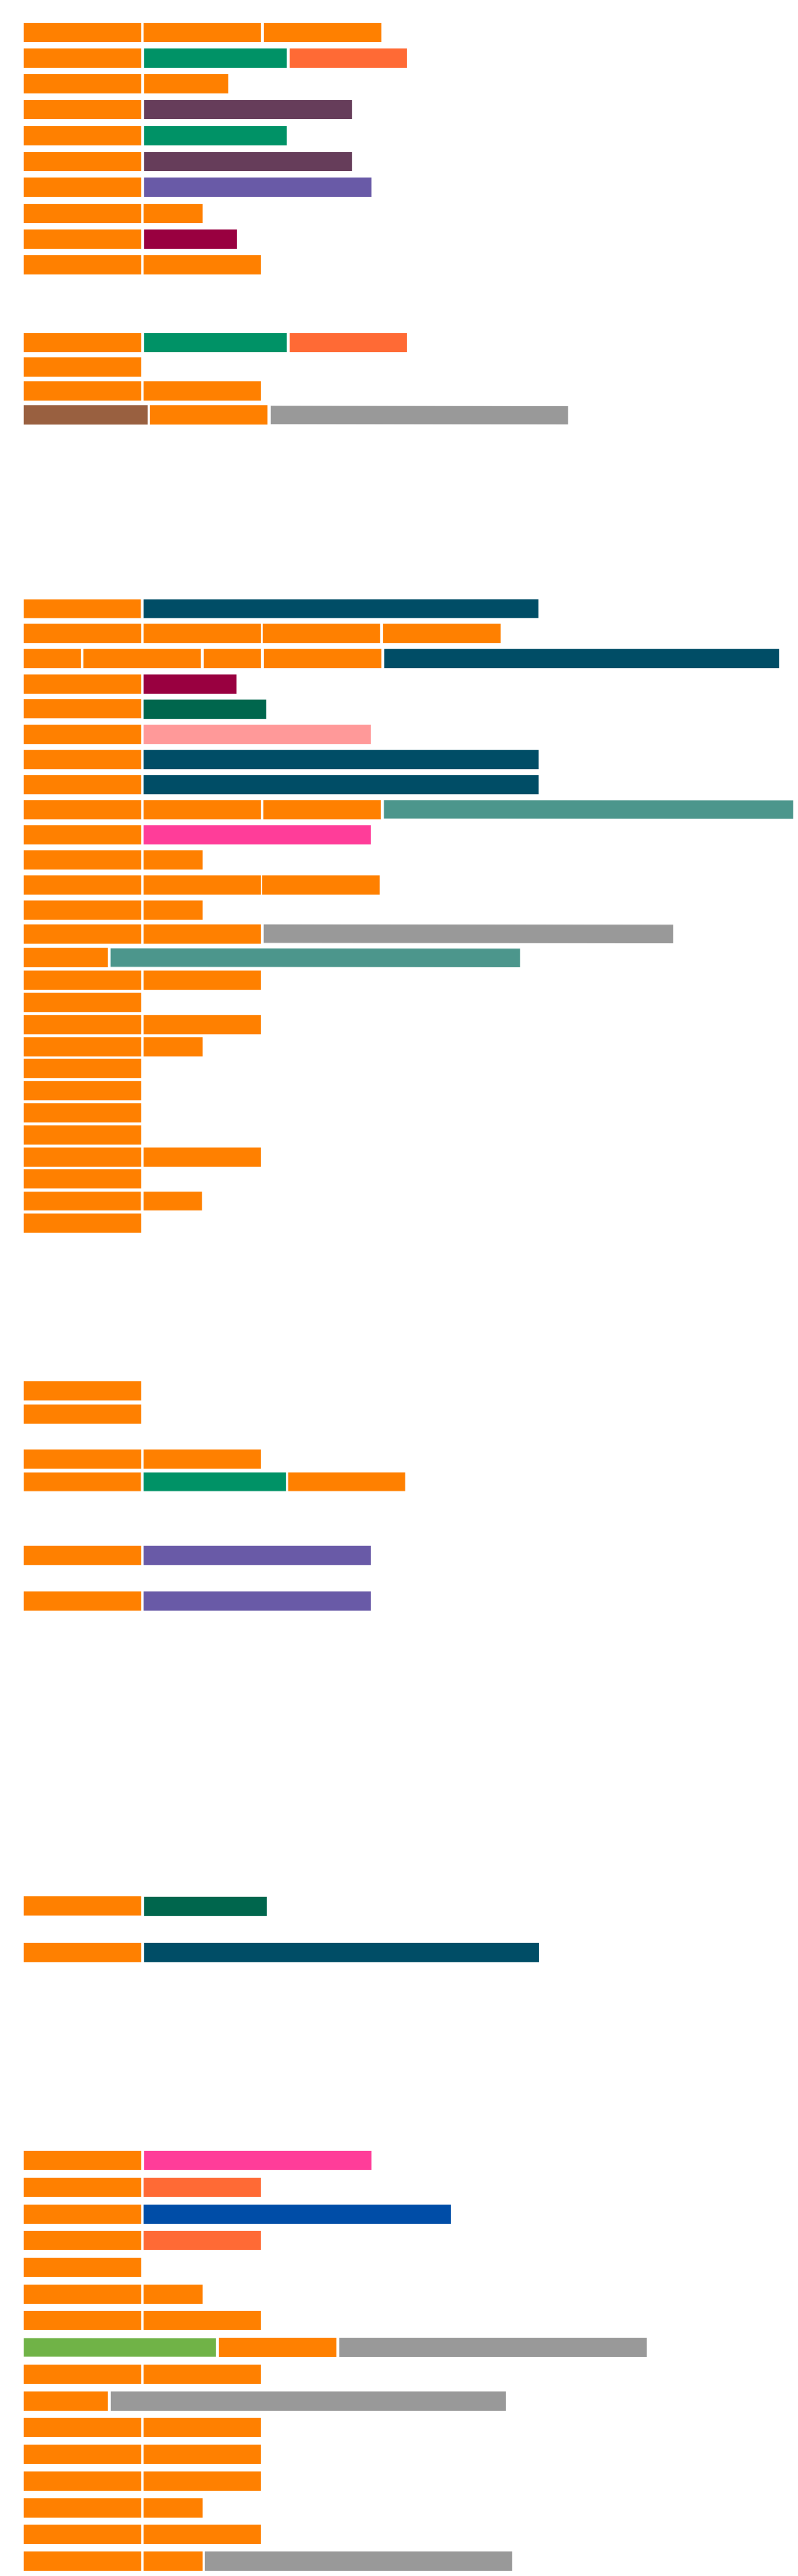

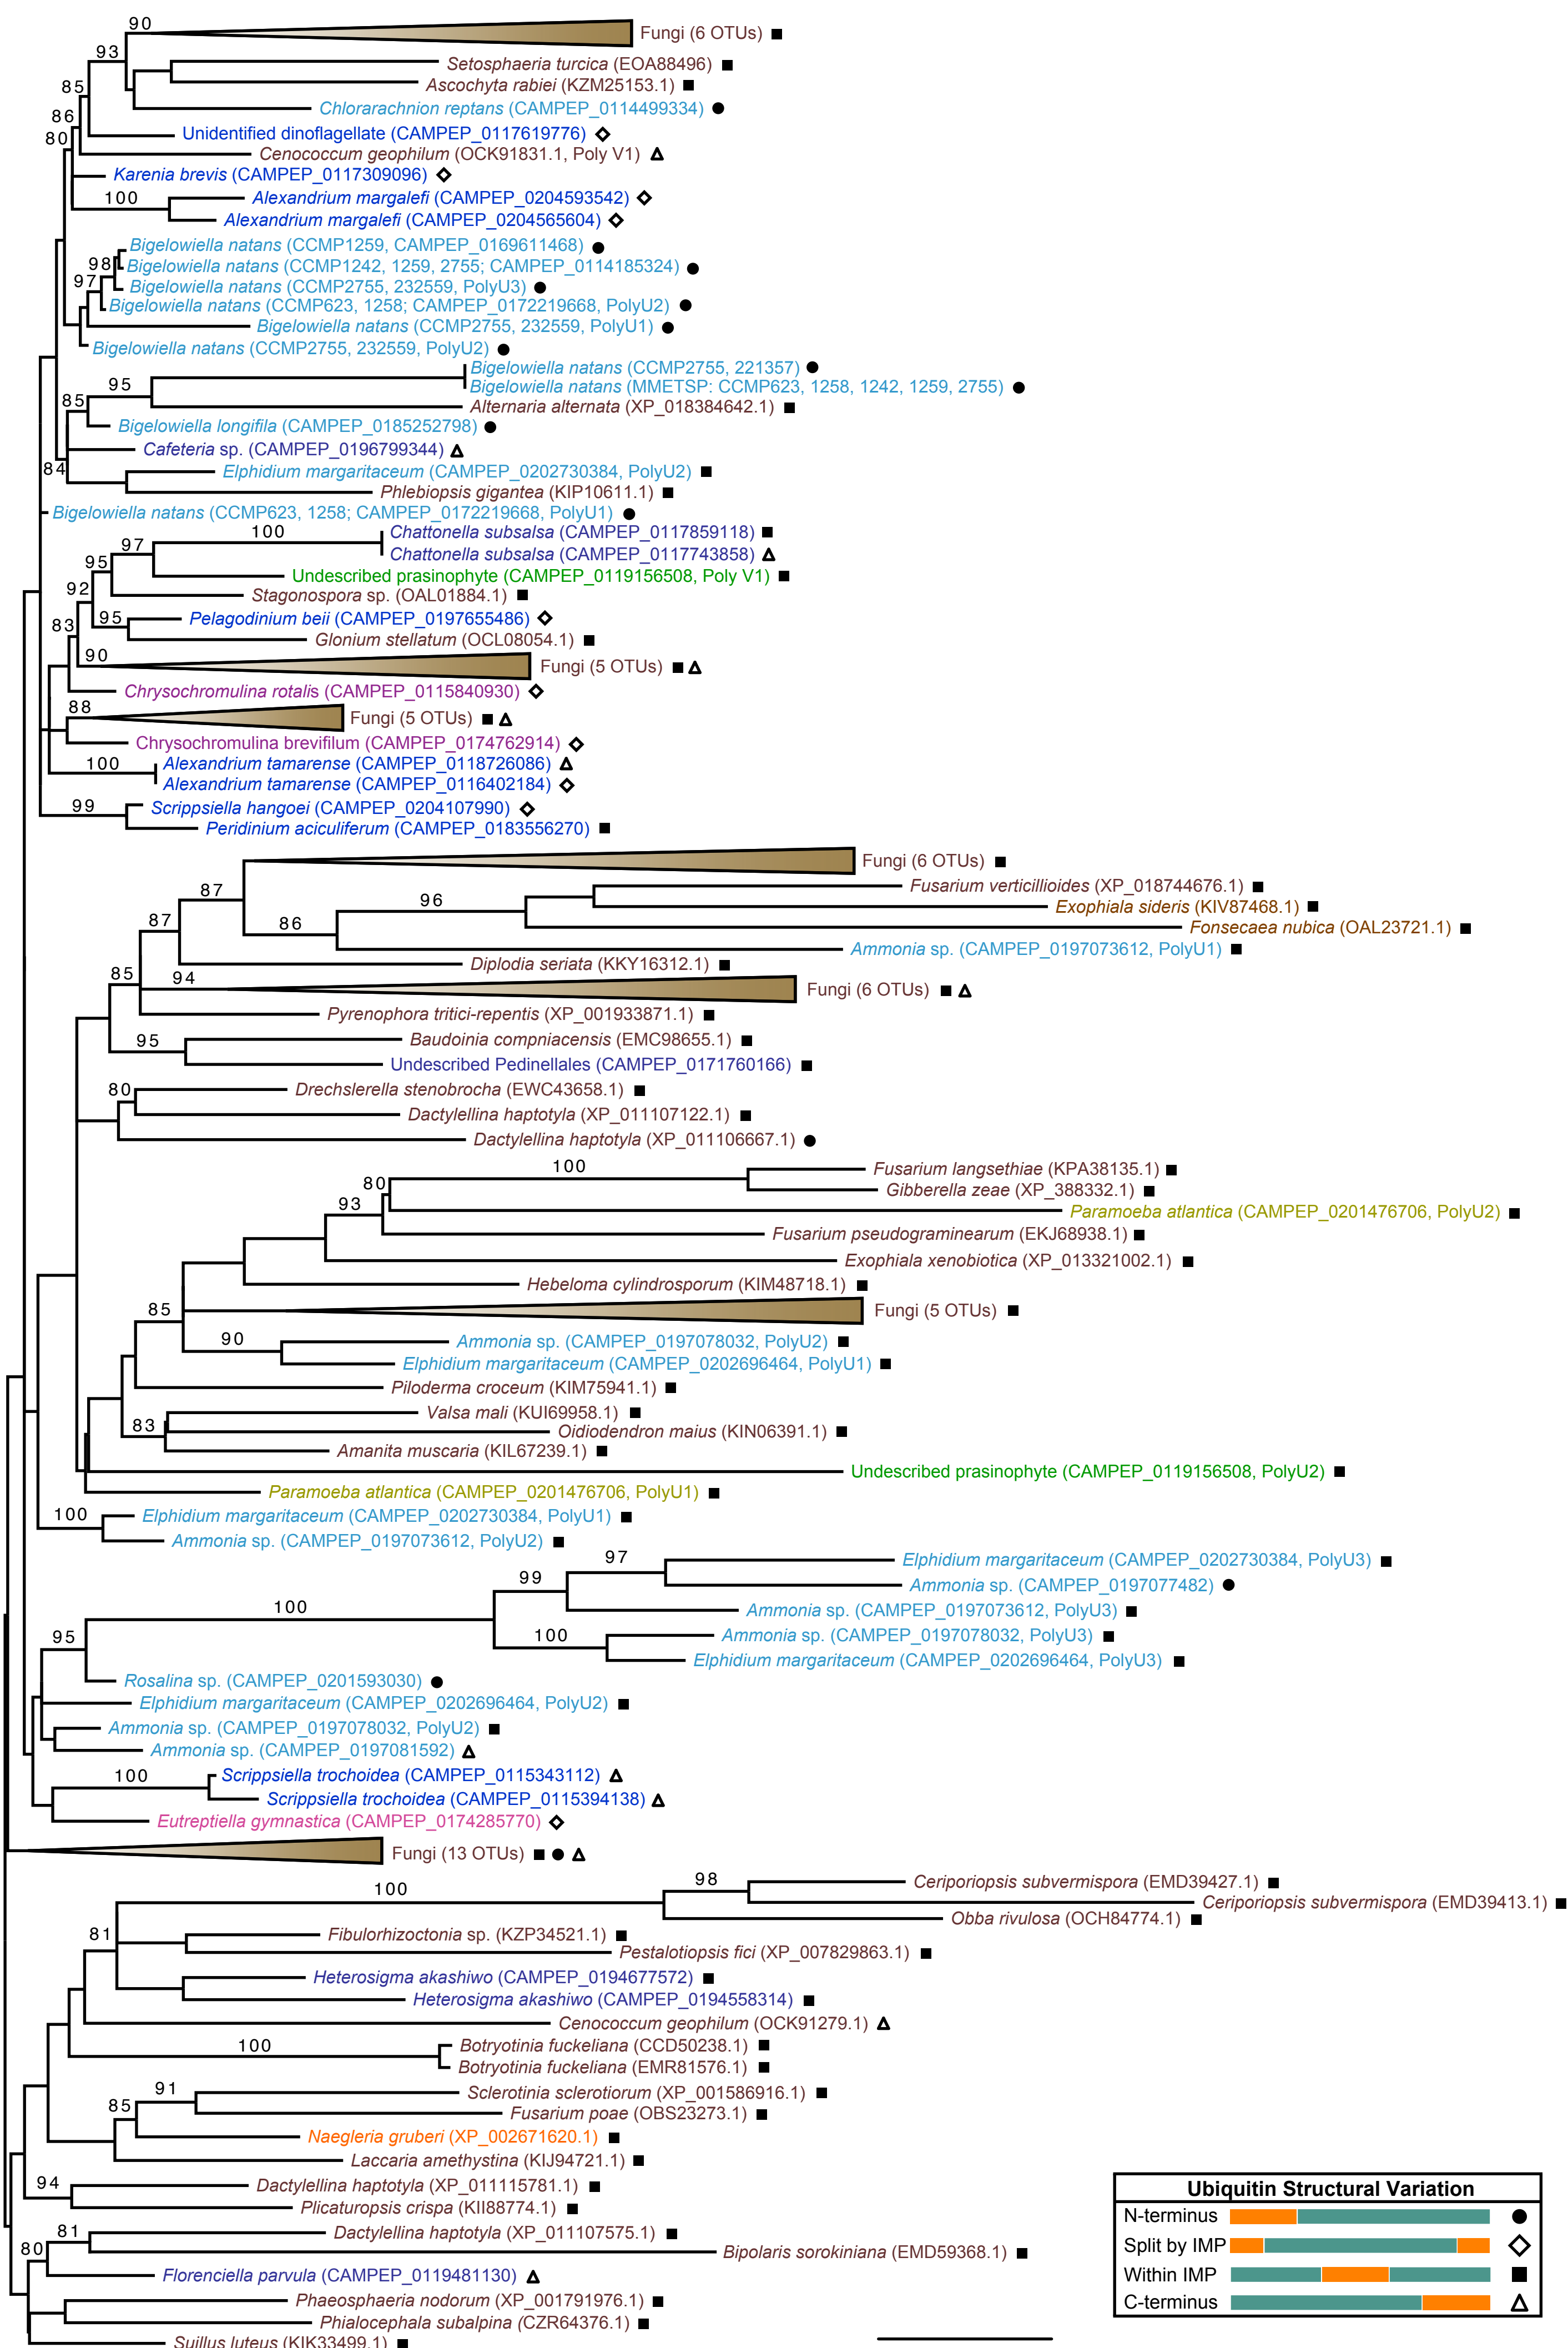

Supplement: 12864_2018_5412_MOESM1_ESM.pdf [file 12864_2018_5412_MOESM1_ESM.pdf]
